# Supplementary material for: Molybdenum and copper catalysis of reductions by titanium(ii) and titanium(iii)
Source: Royal Society of Chemistry journal article supplement (doi:10.1039/b508453a), 2005-11-29
Supplement: b508453a.pdf [file b508453a.pdf]

SUPPLEMENTARY MATERIALS

Tables S-1 to S-7. Detailed kinetic data for catalyzed redox reactions.

S-1

Table S-1. Reduction of vanadium(IV) by Ti(III), as catalyzed by molybdenum(VI),  
kinetic data<sup>a</sup>

| [VO <sup>2+</sup> ], mM | [Mo <sup>VI</sup> ], mM | [H <sup>+</sup> ], M | $k_2$ (M <sup>-1</sup> s <sup>-1</sup> ) <sup>b</sup> |
|-------------------------|-------------------------|----------------------|-------------------------------------------------------|
| 12.0                    | 0.50                    | 0.50                 | 13.5 (13.3)                                           |
| 16.0                    | 0.50                    | 0.50                 | 13.4 (13.3)                                           |
| 20.0                    | 0.50                    | 0.50                 | 13.3 (13.3)                                           |
| 26.0                    | 0.50                    | 0.50                 | 13.5 (13.3)                                           |
| 20.0                    | 0.50                    | 0.10                 | 13.6 (13.3)                                           |
| 20.0                    | 0.025                   | 0.50                 | 2.4 (2.3)                                             |
| 20.0                    | 0.050                   | 0.50                 | 2.8 (2.9)                                             |
| 20.0                    | 0.10                    | 0.50                 | 4.0 (4.0)                                             |
| 20.0                    | 0.20                    | 0.50                 | 6.3 (6.4)                                             |
| 20.0                    | 0.25                    | 0.50                 | 7.0 (7.5)                                             |
| 20.0                    | 1.0                     | 0.50                 | 25 (25)                                               |
| 20.0                    | 2.5                     | 0.50                 | 65 (60)                                               |

---

<sup>a</sup>Reactions at 22 °C,  $\mu$  = 0.50 M (HCl), [Ti<sup>III</sup>] = 3.0 mM throughout;  $\lambda$  = 760 nm.

<sup>b</sup>Second order rate constants; parenthetical values were calculated using rate law (4) in text,

taking rate constants in Table 2.

Table S-2. Reduction of vanadium(IV) by titanium(II), as catalyzed by molybdenum(VI);

kinetic data<sup>a</sup>

| [VO <sup>2+</sup> ], mM | [Mo <sup>VI</sup> ], mM | [H <sup>+</sup> ], M | $k_2$ (M <sup>-1</sup> s <sup>-1</sup> ) <sup>b</sup> |
|-------------------------|-------------------------|----------------------|-------------------------------------------------------|
| 19.0                    | 0.50                    | 0.15                 | 7.7 (7.8)                                             |
| 19.0                    | 0.50                    | 0.50                 | 7.9 (7.8)                                             |
| 18.0                    | 0.010                   | 0.50                 | 3.2 (3.3)                                             |
| 18.0                    | 0.050                   | 0.50                 | 3.7 (3.7)                                             |
| 18.0                    | 0.10                    | 0.50                 | 4.6 (4.2)                                             |
| 18.0                    | 0.15                    | 0.50                 | 4.7 (4.6)                                             |
| 18.0                    | 0.20                    | 0.50                 | 5.1 (5.1)                                             |
| 18.0                    | 0.30                    | 0.50                 | 5.8 (6.0)                                             |
| 18.0                    | 0.40                    | 0.50                 | 6.7 (6.9)                                             |
| 18.0                    | 0.50                    | 0.50                 | 7.7 (7.8)                                             |
| 18.0                    | 1.00                    | 0.50                 | 12.6                                                  |
| (12.3)                  |                         |                      |                                                       |
| 10.0                    | 0.50                    | 0.50                 | 7.9 (7.8)                                             |
| 14.0                    | 0.50                    | 0.50                 | 7.6 (7.8)                                             |
| 28.0                    | 0.50                    | 0.50                 | 7.7 (7.8)                                             |

---

<sup>a</sup>Reactions at 22 °C,  $\mu$  = 0.50 M (CF<sub>3</sub>SO<sub>3</sub>H/HClO<sub>4</sub>/NaClO<sub>4</sub>); [Ti(II)] = 2.5 mM throughout;

$\lambda$  = 760 nm.

<sup>b</sup>Second order rate constants; parenthetical values were calculated using rate law (4) in text,

taking rate constants in Table 2.

Table S-3. Reduction of vanadium(IV) by titanium(II), as catalyzed by copper(II);  
kinetic data<sup>a</sup>

| [VO <sup>2+</sup> ], mM | [Cu <sup>2+</sup> ], mM | [H <sup>+</sup> ], M | k <sub>2</sub> (M <sup>-1</sup> s <sup>-1</sup> ) <sup>b</sup> |
|-------------------------|-------------------------|----------------------|----------------------------------------------------------------|
| 19.0                    | 0.50                    | 0.10                 | 7.9 (7.8)                                                      |
| 19.0                    | 0.50                    | 0.25                 | 7.9 (7.8)                                                      |
| 19.0                    | 0.50                    | 0.50                 | 8.0 (7.8)                                                      |
| 18.0                    | 0.010                   | 0.50                 | 3.3 (3.3)                                                      |
| 18.0                    | 0.050                   | 0.50                 | 3.7 (3.6)                                                      |
| 18.0                    | 0.10                    | 0.50                 | 4.0 (4.1)                                                      |
| 18.0                    | 0.15                    | 0.50                 | 4.5 (4.5)                                                      |
| 18.0                    | 0.20                    | 0.50                 | 4.8 (5.0)                                                      |
| 18.0                    | 0.30                    | 0.50                 | 5.7 (5.9)                                                      |
| 18.0                    | 0.40                    | 0.50                 | 6.9 (6.8)                                                      |
| 18.0                    | 1.00                    | 0.50                 | 12.6 (12.4)                                                    |
| 11.0                    | 0.50                    | 0.50                 | 7.8 (7.8)                                                      |
| 22.0                    | 0.50                    | 0.50                 | 8.0 (7.8)                                                      |
| 33.0                    | 0.50                    | 0.50                 | 7.9 (7.8)                                                      |

---

<sup>a</sup>Reactions at 22.0 ± 0.5 °C, μ = 0.50 M (CF<sub>3</sub>SO<sub>3</sub>H/NaClO<sub>4</sub>); [Ti<sup>II</sup>] = 2.5 mM

throughout;

λ = 760 nm.

<sup>b</sup>Second order rate constants; parenthetical values were calculated using rate law (4)

in text,

taking rate constants in Table 2.

Table S-4. Reduction of benzoquinone by titanium(III), as catalyzed by molybdenum(VI),

kinetic data<sup>a</sup>

| [Ti(III)], mM | [Mo(VI)], mM | [H <sup>+</sup> ], M | 10 <sup>-2</sup> k <sub>2</sub> , M <sup>-1</sup> s <sup>-1</sup> <sup>b</sup> |
|---------------|--------------|----------------------|--------------------------------------------------------------------------------|
| 0.16          | 0            | 0.50                 | 1.11 (1.13)                                                                    |
| 0.16          | 0.0030       | 0.50                 | 1.80 (1.80)                                                                    |
| 0.16          | 0.0060       | 0.50                 | 2.4 (2.5)                                                                      |
| 0.16          | 0.010        | 0.50                 | 3.3 (3.4)                                                                      |
| 0.16          | 0.020        | 0.50                 | 5.3 (5.6)                                                                      |
| 0.16          | 0.010        | 0.060                | 17.6 (19.9)                                                                    |
| 0.16          | 0.010        | 0.10                 | 12.8 (12.3)                                                                    |
| 0.16          | 0.010        | 0.20                 | 7.3 (6.7)                                                                      |
| 0.16          | 0.010        | 0.30                 | 5.5 (4.9)                                                                      |
| 0.16          | 0.010        | 0.40                 | 4.2 (3.9)                                                                      |
| 0.16          | 0.010        | 0.50                 | 3.6 (3.4)                                                                      |
| 0.16          | 0.010        | 0.50                 | 3.3 (3.4)                                                                      |
| 0.50          | 0.010        | 0.50                 | 3.3 (3.4) <sup>c</sup>                                                         |
| 0.66          | 0.010        | 0.50                 | 3.2 (3.4) <sup>d</sup>                                                         |

---

---

<sup>a</sup>Reactions at  $22.0 \pm 0.5$  °C,  $\mu = 0.50$  M (HCl), [Bzqn] = 0.020 mM throughout, [Cl<sup>-</sup>]

=

0.50 M unless otherwise indicated;  $\lambda = 247$  nm. <sup>b</sup> Second order rate constants; parenthetical

values were calculated using rate law (5) in text, taking rate constants in Table 2.

<sup>c</sup>[Cl<sup>-</sup>] = 0.10 M. <sup>d</sup>[Cl<sup>-</sup>] = 0.40 M.

S-5

Table S-5. Reduction of benzoquinone by titanium(II), as catalyzed by molybdenum(VI);

kinetic data<sup>a</sup>

| [Ti(III)], mM | [Me(VI)], mM | $10^{-2}k_2, \text{M}^{-1}\text{s}^{-1}$ <sup>b</sup> |
|---------------|--------------|-------------------------------------------------------|
| 0.10          | 0.010        | 6.6 (6.7)                                             |
| 0.16          | 0.010        | 6.6 (6.7)                                             |
| 0.20          | 0.010        | 6.6 (6.7)                                             |
| 0.30          | 0.010        | 6.6 (6.7)                                             |
| 0.10          | 0            | 2.0 (2.2)                                             |
| 0.10          | 0.0010       | 2.8 (2.6)                                             |
| 0.10          | 0.0020       | 3.4 (3.1)                                             |
| 0.10          | 0.0040       | 3.9 (4.0)                                             |
| 0.10          | 0.0060       | 5.1 (4.9)                                             |
| 0.10          | 0.0080       | 5.8 (5.8)                                             |
| 0.10          | 0.012        | 7.5 (7.5)                                             |
| 0.10          | 0.016        | 9.4 (9.3)                                             |

---

<sup>a</sup>Reactions at  $22.0 \pm 0.5$  °C,  $\mu = 0.50$  M (CF<sub>3</sub>SO<sub>3</sub>H),  $\lambda = 247$  nm, [Bzqn] = 0.020 mM throughout, reactions independent of [H<sup>+</sup>] in the range 0.10-0.50 M.

<sup>b</sup>Second order rate constants; parenthetical values were calculated using rate law (4) in text

in conjunction with  $k_o = 2.2 \times 10^2 \text{ M}^{-1}\text{s}^{-1}$  and  $k_{\text{cat}} = 4.5 \times 10^7 \text{ M}^{-2}\text{s}^{-1}$ .

S-6

Table S-6. Reduction of I<sub>3</sub><sup>-</sup> by titanium(III), as catalyzed by molybdenum(VI); kinetic data<sup>a</sup>

| [Ti(III)], mM | [Mo(VI)], mM | $k_2, \text{M}^{-1}\text{s}^{-1}{}^b$ |
|---------------|--------------|---------------------------------------|
| 8.5           | 0            | 0.33 (0.33)                           |
| 5.0           | 0.0010       | 1.93 (1.83)                           |
| 5.0           | 0.0020       | 3.3 (3.3)                             |
| 5.0           | 0.0030       | 4.2 (4.8)                             |
| 5.0           | 0.0040       | 6.4 (6.3)                             |
| 5.0           | 0.0050       | 7.7 (7.8)                             |
| 5.0           | 0.0080       | 13.4 (12.3)                           |
| 5.0           | 0.012        | 19.1 (18.3)                           |
| 5.0           | 0.020        | 31 (30)                               |
| 5.0           | 0.040        | 62 (60)                               |
| 1.5           | 0.10         | 160 (150)                             |
| 3.0           | 0.10         | 155 (150)                             |
| 4.5           | 0.10         | 154 (150)                             |

|     |      |           |
|-----|------|-----------|
| 5.0 | 0.10 | 149 (150) |
| 6.0 | 0.10 | 147 (150) |
| 5.0 | 0.20 | 296 (300) |

<sup>a</sup>Reactions at  $22.0 \pm 0.5$  °C,  $\mu = 0.55$  M (0.50 M HCl/0.050 M KI),  $[I_3^-]$  0.25 mM throughout,

$\lambda = 450$  nm. Reactions independent of  $[H^+]$  and  $[Cl^-]$ . <sup>b</sup>Second order rate constants; Parenthetical values were calculated using rate law (4) in text in conjunction with the values

$k_o = 0.33$  M<sup>-1</sup>s<sup>-1</sup> and  $k_{cat} = 1.50 \times 10^6$  M<sup>-2</sup>s<sup>-1</sup>.

S-7

Table S-7. Reduction of  $I_3^-$  by titanium(II), as catalyzed by molybdenum(VI); kinetic data<sup>a</sup>

| [Ti(II)], mM | [Mo(VI)], mM | $k_2$ , M <sup>-1</sup> s <sup>-1</sup> <sup>b</sup> |
|--------------|--------------|------------------------------------------------------|
| 3.3          | 0            | 0.32 (0.32)                                          |
| 5.0          | 0.0010       | 1.04 (1.02)                                          |
| 5.0          | 0.0020       | 1.78 (1.73)                                          |
| 5.0          | 0.0040       | 2.8 (3.1)                                            |
| 5.0          | 0.0080       | 5.4 (5.9)                                            |
| 1.5          | 0.014        | 10.3 (10.2)                                          |
| 3.0          | 0.014        | 10.5 (10.2)                                          |
| 6.0          | 0.014        | 9.7 (10.2)                                           |
| 5.0          | 0.016        | 12.1 (11.6)                                          |
| 5.0          | 0.032        | 17.2 (22.9)                                          |
| 5.0          | 0.064        | 51 (45)                                              |
| 5.0          | 0.10         | 70 (71)                                              |
| 5.0          | 0.20         | 131 (141)                                            |

<sup>a</sup>Reactions at  $22.0 \pm 0.5$  °C.  $\mu = 0.55$  M (0.50 M CF<sub>3</sub>SO<sub>3</sub>H/0.050 M KI), [I<sub>3</sub><sup>-</sup>] = 0.25 mM;

$\lambda = 450$  nm. Reactions independent of [H<sup>+</sup>] and [Cl<sup>-</sup>]. <sup>b</sup>Second order rate constants; parenthetical values were calculated using rate law (4) in text, taking  $k_o = 0.32$  M<sup>-1</sup>s<sup>-1</sup> and  $k_{\text{cat}} = 7.1 \times 10^5$  M<sup>-2</sup>s<sup>-1</sup>.
